# Supplementary material for: Clinical phenotype associations with various types of anti-dsDNA antibodies in patients with recent onset of rheumatic symptoms. Results from a multicentre observational study
Source: PubMed Central journal article supplement — Lupus Sci Med. 2014 Apr 1;1(1):e000007. doi: 10.1136/lupus-2013-000007 (PMC4225731; doi:10.1136/lupus-2013-000007), 2014-04-01
Supplement: lupus-2013-000007-s1.pdf [file lupus-2013-000007-s1.pdf]

# Scandinavian anti-DNA Study (ScantiDNA)

# clinical case record form

Patient no.: \_\_\_\_\_  
 Date of birth: \_\_\_/\_\_\_/\_\_\_  
 Date of inclusion: \_\_\_/\_\_\_/\_\_\_  
 Smoking: yes / no / previous

Gender: M / F  
 Race: White / Asian / African / Hispanic  
 Pacific / American Indian or Alaskan  
 Height: \_\_\_\_\_ cm Weight: \_\_\_\_\_ kg

Manifestation: absent = 0; present = X  
 inactive = I; unknown = U  
 Onset of manifestation:  
 \_\_\_/\_\_\_ : month / year

## General symptoms

Noninfectious fever.....  \_\_\_/\_\_\_  
 Weight loss.....  \_\_\_/\_\_\_  
 Anorexia.....  \_\_\_/\_\_\_  
 Other.....  \_\_\_/\_\_\_

## Skin

Butterfly rash.....  \_\_\_/\_\_\_  
 Photosensitivity.....  \_\_\_/\_\_\_  
 Discoid LE.....  \_\_\_/\_\_\_  
 Subacute LE.....  \_\_\_/\_\_\_  
 Alopecia.....  \_\_\_/\_\_\_  
 Purpura.....  \_\_\_/\_\_\_  
 Cut. vasculitis.....  \_\_\_/\_\_\_  
 Genital ulcers.....  \_\_\_/\_\_\_  
 Chronic urticaria.....  \_\_\_/\_\_\_  
 Teleangiectasias.....  \_\_\_/\_\_\_  
 Rheumatoid nodules.....  \_\_\_/\_\_\_  
 Panniculitis.....  \_\_\_/\_\_\_  
 Bullae.....  \_\_\_/\_\_\_  
 Periorbital edema/cyanosis.....  \_\_\_/\_\_\_  
 Gottrons sign.....  \_\_\_/\_\_\_  
 Livedo reticularis.....  \_\_\_/\_\_\_  
 Pitting scars.....  \_\_\_/\_\_\_  
 Proximal scleroderma.....  \_\_\_/\_\_\_  
 Psoriasis.....  \_\_\_/\_\_\_  
 Other.....  \_\_\_/\_\_\_

## Joints and muscles

Morning stiffness.....  \_\_\_/\_\_\_  
 Palindromic arthritis.....  \_\_\_/\_\_\_  
 Puffy fingers.....  \_\_\_/\_\_\_  
 Peripheral arthritis.....  \_\_\_/\_\_\_  
 Axial arthritis.....  \_\_\_/\_\_\_  
 Arthralgia.....  \_\_\_/\_\_\_  
 Erosions on x-ray.....  \_\_\_/\_\_\_  
 Tendinitis.....  \_\_\_/\_\_\_  
 Myositis.....  \_\_\_/\_\_\_  
 Fibromyalgia.....  \_\_\_/\_\_\_  
 Other.....  \_\_\_/\_\_\_

## Eyes

Keratoconjunctivitis sicca....  \_\_\_/\_\_\_  
 Scleritis/episcleritis.....  \_\_\_/\_\_\_  
 Anterior uveitis.....  \_\_\_/\_\_\_  
 Posterior uveitis.....  \_\_\_/\_\_\_  
 Retinal vasculitis.....  \_\_\_/\_\_\_  
 Other.....  \_\_\_/\_\_\_

## Vascular system

Raynauds phenomenon..  \_\_\_/\_\_\_  
 Venous thrombosis.....  \_\_\_/\_\_\_  
 Arterial thrombosis.....  \_\_\_/\_\_\_  
 Cerebral infarction.....  \_\_\_/\_\_\_  
 Transient ischemic attack  \_\_\_/\_\_\_  
 Avascular bone necrosis..  \_\_\_/\_\_\_  
 Claudicatio intermittens...  \_\_\_/\_\_\_  
 Arterial hypertension.....  \_\_\_/\_\_\_  
 >1 spontaneous abortion.  \_\_\_/\_\_\_  
 Other.....  \_\_\_/\_\_\_

## Heart

Pericarditis.....  \_\_\_/\_\_\_  
 Myocarditis.....  \_\_\_/\_\_\_  
 Endocarditis.....  \_\_\_/\_\_\_  
 Angina.....  \_\_\_/\_\_\_  
 Myocardial infarction.....  \_\_\_/\_\_\_  
 Arrythmia.....  \_\_\_/\_\_\_  
 Cardiac failure.....  \_\_\_/\_\_\_  
 Other.....  \_\_\_/\_\_\_

## Pulmonary

Pleuritis.....  \_\_\_/\_\_\_  
 Alveolitis/fibrosis.....  \_\_\_/\_\_\_  
 Pulmonary hypertension..  \_\_\_/\_\_\_  
 Astma bronch/COLD.....  \_\_\_/\_\_\_  
 Other.....  \_\_\_/\_\_\_

## Kidney

Proteinuria.....  \_\_\_/\_\_\_  
 Hematuria.....  \_\_\_/\_\_\_  
 Sterile pyuria.....  \_\_\_/\_\_\_  
 Cellular casts.....  \_\_\_/\_\_\_  
 Glom.nephritis on biopsy.  \_\_\_/\_\_\_  
 WHO class.....  \_\_\_/\_\_\_  
 Other.....  \_\_\_/\_\_\_

## Gastrointestinal

Oral/nasal ulcers.....  \_\_\_/\_\_\_  
 Xerostomia.....  \_\_\_/\_\_\_  
 Sterile peritonitis/ascites..  \_\_\_/\_\_\_  
 Intestinal vasculitis.....  \_\_\_/\_\_\_  
 Autoimmune hepatitis.....  \_\_\_/\_\_\_  
 Prim. biliary cirrhosis.....  \_\_\_/\_\_\_  
 Celiac disease.....  \_\_\_/\_\_\_  
 Other.....  \_\_\_/\_\_\_

## Hematology

Non-hemolytic anemia....  \_\_\_/\_\_\_  
 Immun hemolytic anemia  \_\_\_/\_\_\_  
 Leucocytopenia.....  \_\_\_/\_\_\_  
 Lymphocytopenia.....  \_\_\_/\_\_\_  
 Thrombocytopenia.....  \_\_\_/\_\_\_  
 Lymphadenopathy.....  \_\_\_/\_\_\_  
 Other.....  \_\_\_/\_\_\_

## Neuropsychiatry

Headache.....  \_\_\_/\_\_\_  
 Cognitive dysfunct.....  \_\_\_/\_\_\_  
 Seizures/chorea.....  \_\_\_/\_\_\_  
 Peripheral neuropathy.....  \_\_\_/\_\_\_  
 Cranial nerve affection....  \_\_\_/\_\_\_  
 Transverse myelopathy...  \_\_\_/\_\_\_  
 Organic brain syndrome..  \_\_\_/\_\_\_  
 Psychosis.....  \_\_\_/\_\_\_  
 Affective disorder.....  \_\_\_/\_\_\_  
 Other.....  \_\_\_/\_\_\_

## Endocrinology

Thyroiditis.....  \_\_\_/\_\_\_  
 Type 1 diabetes mellitus..  \_\_\_/\_\_\_  
 Amenorrhea.....  \_\_\_/\_\_\_  
 Other.....  \_\_\_/\_\_\_

## Infections

>2 major infections.....  \_\_\_/\_\_\_  
 Current infection:

## Malignancy

Previous malignancy.....  \_\_\_/\_\_\_  
 - Type  
 Current malignancy.....  \_\_\_/\_\_\_  
 - Type

## Medication last yr

Heart .....   
 Blood pressure.....   
 Epilepsia.....   
 Others.....

## Laboratory

ESR (mm/h)..... \_\_\_-\_\_\_  
 CRP (mg/L)..... \_\_\_-\_\_\_  
 Hgb (mmol/L)..... \_\_\_ , \_\_\_  
 Creatinin (μmol/L)..... \_\_\_-\_\_\_
