# Supplementary material for: Clinical phenotype associations with various types of anti-dsDNA antibodies in patients with recent onset of rheumatic symptoms. Results from a multicentre observational study
Source: PubMed Central journal article supplement — Lupus Sci Med. 2014 Apr 1;1(1):e000007. doi: 10.1136/lupus-2013-000007 (PMC4225731; doi:10.1136/lupus-2013-000007), 2014-04-01
Supplement: lupus-2013-000007-s3.pdf [file lupus-2013-000007-s3.pdf]

**Table S3. Number of anti-dsDNA positive patients and prevalence of their clinical manifestations.**

| Assays                                                   | Any<br>CLIFT + | Any<br>ELISA + | CLIFT +<br>ELISA - | CLIFT -<br>ELISA + | CLIFT+<br>ELISA+ |
|----------------------------------------------------------|----------------|----------------|--------------------|--------------------|------------------|
| <b>Total number of patients</b>                          | <b>59</b>      | <b>99</b>      | <b>25</b>          | <b>65</b>          | <b>34</b>        |
| <b>Manifestations among SLE classification criteria:</b> |                |                |                    |                    |                  |
| Peripheral arthritis (%)                                 | 30.5           | 21.2           | 44                 | 21.5               | 20.6             |
| Photosensitivity (%)                                     | 6.8            | 6.1            | 8                  | 6.1                | 5.9              |
| Oral/nasal ulcers (%)                                    | 5.1            | 9.1            | 4                  | 10.8               | 5.9              |
| Haematuria (%)                                           | 10.2           | 8.1            | 4                  | 4.6                | 14.7             |
| Proteinuria (%)                                          | 16.9           | 13.1           | 4                  | 6.1                | 26.5             |
| Malar rash (%)                                           | 6.8            | 4              | 0                  | 0                  | 11.8             |
| Leukopenia (%)                                           | 10.2           | 8.1            | 8                  | 6.1                | 11.8             |
| Alopecia (%)                                             | 6.8            | 5              | 4                  | 3.1                | 8.8              |
| Lymphopenia (%)                                          | 10.2           | 4              | 8                  | 0                  | 11.8             |
| Discoid LE (%)                                           | 1.7            | 1              | 4                  | 1.5                | 0                |
| Thrombocytopenia (%)                                     | 6.8            | 4              | 8                  | 3.1                | 5.9              |
| Pleuritis (%)                                            | 5.1            | 4              | 0                  | 1.5                | 8.8              |
| <b>Other manifestations:</b>                             |                |                |                    |                    |                  |
| Arthralgia (%)                                           | 44.1           | 42.4           | 60                 | 47.7               | 32.3             |
| Morning joint stiffness (%)                              | 13.6           | 11.1           | 24                 | 13.8               | 5.9              |
| Raynaud´s phenomenon (%)                                 | 18.6           | 15.1           | 20                 | 13.8               | 17.6             |
| Headache (%)                                             | 10.2           | 11.1           | 20                 | 15.4               | 2.9              |
| Xerostomia (%)                                           | 10.2           | 13.1           | 12                 | 15.4               | 8.8              |
| Arterial hypertension (%)                                | 11.9           | 12.1           | 12                 | 12.3               | 11.8             |

|                                |      |      |    |      |      |
|--------------------------------|------|------|----|------|------|
| Tendinitis (%)                 | 1.7  | 11.1 | 0  | 15.4 | 2.9  |
| Psoriasis (%)                  | 5.1  | 4    | 8  | 4.6  | 2.9  |
| Affective disorder (%)         | 5.1  | 6.1  | 8  | 7.7  | 2.9  |
| Keratoconjunctivitis sicca (%) | 3.4  | 6.1  | 4  | 7.7  | 2.9  |
| Asthma bronchiale (%)          | 13.6 | 9.1  | 16 | 7.7  | 11.8 |
| Puffy fingers (%)              | 6.8  | 6.1  | 12 | 7.7  | 2.9  |
| Thyreoiditis (%)               | 5.1  | 5    | 4  | 4.6  | 5.9  |
| Peripheral neuropathy (%)      | 5.1  | 4    | 8  | 4.6  | 2.9  |
| Weight loss (%)                | 6.8  | 4    | 8  | 3.1  | 5.9  |
| Axial arthritis (%)            | 5.1  | 4    | 4  | 3.1  | 5.9  |
| Fibromyalgia (%)               | 1.7  | 5    | 0  | 6.1  | 2.9  |
| Anaemia, non-haemolytic (%)    | 10.2 | 4    | 8  | 0    | 11.8 |
| Non-infectious fever (%)       | 1.7  | 2    | 4  | 3.1  | 0    |
| Arrhythmia (%)                 | 3.4  | 4    | 0  | 3.1  | 5.9  |
| Cutaneous vasculitis (%)       | 10.2 | 8.1  | 0  | 3.1  | 17.6 |
| Miscarriage/abortion (%)       | 3.4  | 1    | 4  | 0    | 2.9  |
| Chronic urticaria (%)          | 1.7  | 0    | 4  | 0    | 0    |
| Livedo reticularis (%)         | 3.4  | 0    | 8  | 0    | 0    |
| Palindromic arthritis (%)      | 3.4  | 2    | 4  | 1.5  | 2.9  |
